# Supplementary material for: Oceanographic habitat and the coral microbiomes of urban-impacted reefs
Source: PeerJ. 2019 Sep 10;7:e7552. doi: 10.7717/peerj.7552 (PMC6743471; doi:10.7717/peerj.7552)
Supplement: Supplemental Information 7 — Table lists linear regression pvalues and R2. Bold markings indicate ASV with p < 0.05, R2 > 0.2 that were plotted [file peerj-07-7552-s007.xlsx]

## Sheet: Sheet1
ASV alias	ASV Dada2 label	RFR importance	Category	lm Pvalue	lm R2	Kingdon	Phylum	Class	Order	Family	Genus	Species
ASV7785	832cdb9a862622c5452b2e8c00b76cdb	0.06609	AlongshoreCurents	0.2202	0.02822	Bacteria	Actinobacteria	Acidimicrobiia	Actinomarinales	Actinomarinaceae	Candidatus Actinomarina
ASV12637	d4b4b78ce0d91cb701ab23be4d25be10	0.06314	AlongshoreCurents	0.7612	0.001757	Bacteria	Proteobacteria	Gammaproteobacteria	Betaproteobacteriales	Burkholderiaceae	Ralstonia
ASV11503	c27b3c375b3d767361d4c0ba0f9072c2	0.05954	AlongshoreCurents	0.6826	0.00318	Bacteria	Proteobacteria	Gammaproteobacteria	SAR86 clade
ASV2244	260c8a7ad465db9070ab9904dfa1302a	0.05491	AlongshoreCurents	0.0009656	0.1873	Bacteria	Bacteroidetes	Bacteroidia	Flavobacteriales	NS9 marine group
ASV7017	760a7e94a82cecd4eecc0f1c01406775	0.04296	AlongshoreCurents	0.0009286	0.08167	Bacteria	Proteobacteria	Alphaproteobacteria	Parvibaculales	PS1 clade	uncultured alpha proteobacterium	uncultured alpha proteobacterium
ASV8079	8881e98dc1fc0a11f7a0488604020cf6	0.8809	Temperature	0.001663	0.1716	Bacteria	Proteobacteria	Gammaproteobacteria	Pseudomonadales	Moraxellaceae
ASV6362	6be8f44f4614f56b7fc070a1e8c1ffd1	0.01215	Temperature	0.2439	0.02554	Bacteria	Actinobacteria	Acidimicrobiia	Actinomarinales	Actinomarinaceae
ASV9915	a76c6d7e4e3b34cafccd354298397d88	0.01029	Temperature	0.1959	0.03136	Bacteria	Proteobacteria	Gammaproteobacteria	SAR86 clade	marine metagenome
ASV5490	5d6fc7dadc555a0425f5141a7fa1b701	0.009766	Temperature	0.00012	0.3063	Bacteria	Proteobacteria	Gammaproteobacteria	SAR86 clade
ASV13871	e998fe24defc1efb769672670733ebd2	0.007674	Temperature	0.5713	0.006087	Bacteria	Verrucomicrobia	Verrucomicrobiae	Arctic97B-4 marine group
ASV8079	8881e98dc1fc0a11f7a0488604020cf6	0.05005	SignificantWaveHeight	0.01654	0.1036	Bacteria	Proteobacteria	Gammaproteobacteria	Pseudomonadales	Moraxellaceae	Acinetobacter
ASV13320	e02483287a21b8a6b411a462a4bcd485	0.04448	SignificantWaveHeight	2.5e-05	0.2872	Archaea	Euryarchaeota	Thermoplasmata	Marine Group II
ASV5088	5694ceb2eec47b665b35641ade8de08e	0.04057	SignificantWaveHeight	0.004684	0.1413	Archaea	Euryarchaeota	Thermoplasmata	Marine Group II	uncultured marine archaeon DCM3921	uncultured marine archaeon DCM3921	uncultured marine archaeon DCM3921
ASV8614	9180d3ef3406086b183e8e2d6dee25e6	0.03847	SignificantWaveHeight	0.0001085	0.2482	Bacteria	Bacteroidetes	Bacteroidia	Flavobacteriales	Flavobacteriaceae	Tenacibaculum
ASV3470	3b1ca9ca54e608501743b02279ff2e3d	0.03469	SignificantWaveHeight	0.01994	0.09803	Bacteria	Proteobacteria	Gammaproteobacteria	Pseudomonadales	Moraxellaceae	Acinetobacter
